# Supplementary material
Source: publisher site journal article supplement (https://www.dovepress.com/article/233326)
Supplement: Supplementary file 1 [file get_supplementary_file.php]

**Supplementary appendix**

**Clinical manifestations and risk factors of *Streptococcus suis* mortality among northern Thai population: retrospective 13-year cohort study**

Ajaree Rayanakorn1, Wasan Katip2, Bey Hing Goh3,4, Peninnah Oberdorfer5, Learn Han Lee1

1 Novel Bacteria and Drug Discovery Research Group (NBDD), Microbiome and Bioresource Research Strength, Jeffrey Cheah School of Medicine and Health Sciences, Monash University Malaysia, Bandar Sunway, Malaysia

2 Department of Pharmaceutical Care, Faculty of Pharmacy, Chiang Mai University, Chiang Mai, Thailand

3 Biofunctional Molecule Exploratory Research Group (BMEX), Biomedicine Research Advancement Centre (BRAC), School of Pharmacy, Monash University Malaysia, Bandar Sunway, Malaysia

4 Health and Well-Being Cluster, Global Asia in the 21st Century (GA21) Platform, Monash University Malaysia, Bandar Sunway 47500, Malaysia

5 Division of Pediatric Infectious Diseases, Department of Pediatrics, Faculty of Medicine, Chiang Mai University, Chiang Mai, Thailand

**Table S1 List of Northern provinces of Thailand as of 2018** (National Statistics Office (NSO). [cited 2019 22 July]; Available from: http://www.nso.go.th/sites/2014/nsopublic)

| **Upper Northern Thailand** | **Lower Northern Thailand** |
| --- | --- |
| Chiang Rai | Tak |
| Chiang Mai | Kamphaeng Phet |
| Nan | Nakhon Sawan |
| Phayao | Phetchabun |
| Phrae | Phichit |
| Mae Hong Son | Phitsanulok |
| Lumphun | Sukhothai |
| Lampang | Uthai Thani |
| Uttaradit |  |

**Figure S1 Biochemical test protocol for identification of *Streptococcus suis* strains**


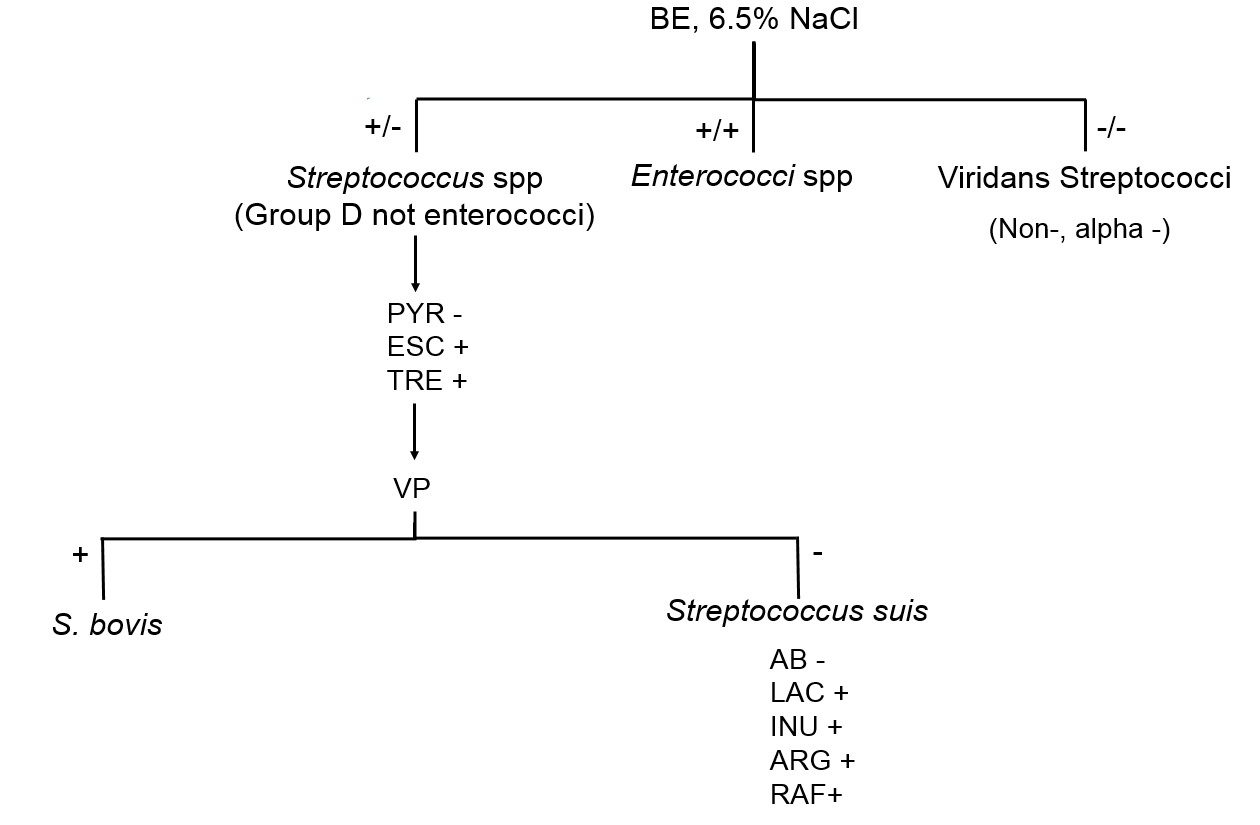


*Streptococcus suis strains* is alpha-hemolysis in sheep blood agar with no growth in broth with 6.5% NaCl and positive in esculine, trehalose reactions, negative in Voges-Proskauer, pyrrolidonyl arylamidase with following biochemical characteristics: acid fermentation of lactose, inulin, raffinose broth, hydrolysis of L-arginine, no acid fermentation of arabinose.

Abbreviations: BE, bile esculin, PYR, pyrrolidonyl arylamidase, ESC, esculin, TRE, D-Trehalose, VP, Voges-Proskauer, AB, arabinose, LAC, D-Lactose, INU, inulin, ARG, L-arginine, RAF, D-raffinose

**Table S2 Significant predictors of *S. suis* mortality**

| Predictors | Multivariable analysis | | | Multivariable analysis | | |
| --- | --- | --- | --- | --- | --- | --- |
|  | Adjusted OR | 95% CI | p-value | Adjusteda OR | 95% CI | p-value |
| GCS <8 | 1.71 | 0.10-28.50 | 0.709 | - | - | - |
| Time to microbiological cure > 6 days | **43.57** | 2.46-772.80 | **0.010** | **33.19** | **2.82-386.10** | **0.005** |
| ALD | 2.24 | 0.32-15.84 | 0.417 | - | - | - |
| Acute meningitis | 0.24 | 0.03-2.33 | 0.236 | - | - | - |
| Septic shock | **13.34** | 1.63-109.03 | **0.016** | **13.61** | **2.57-72.00** | **0.002** |
| Direct bilirubin >1.5 mg/dl | **12.86** | 1.91-86.59 | **0.009** | **17.06** | **2.73-106.47** | **0.002** |
| Creatinine >1.8 mg/dl | 0.41 | 0.01-6.49 | 0.414 | - | - | - |
| Bicarbonate <18 mmol/L | 3.00 | 0.12-73.62 | 0.500 | - | - | - |
| Albumin <3.5 g/dl | 10.97 | 0.96-125.81 | 0.054 | **23.46** | **2.44-225.92** | **0.006** |

*Note:* Significant predictors were indicated in bold.

a Forward and backward stepwise logistic regression with p-value <0.05
